# Supplementary material for: Meta-Analysis of Genome-Wide Association Studies Identifies Six New Loci for Serum Calcium Concentrations
Source: PubMed Central journal article supplement (PMC3778004; doi:10.1371/journal.pgen.1003796), 2013-09-19

**SUPPLEMENTARY FIGURE 7: RELATIVE mRNA EXPRESSION IN SEGMENT OF KIDNEY TUBULES OF GENES LOCATED IN NON-REPLICATION LOCI.**

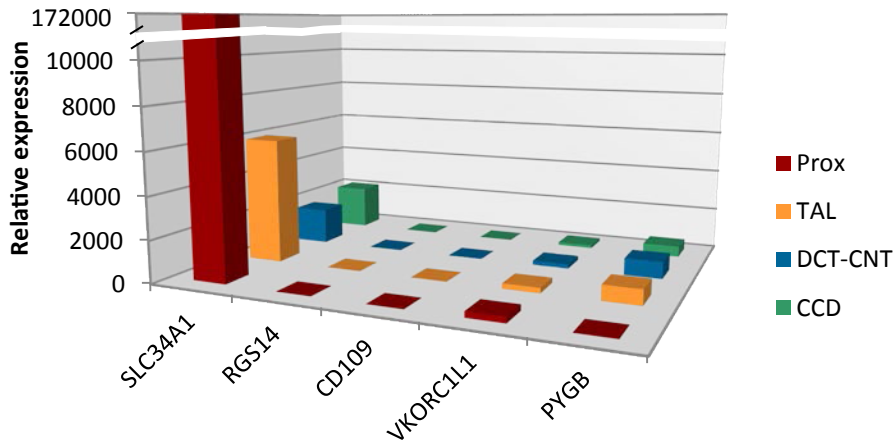

**SUPPLEMENTARY FIGURE 8: RELATIVE EXPRESSION OF GENES IN NON-REPLICATED LOCI UNDER VARIOUS CALCIUM DIETS.**

Data are means  $\pm$  SEM of values obtained from 5 mice fed a low (0.17%) and high (1.69%) calcium diet compared to mice fed a normal calcium diet (0.82%). Expression levels were normalized to actin. Statistical difference was calculated using unpaired t-test.

\*:  $p \leq 0.05$  (low compared to high);

§:  $p \leq 0.05$  (low compared to normal);

#:  $p \leq 0.05$  (high compared to normal).

**Kidney**

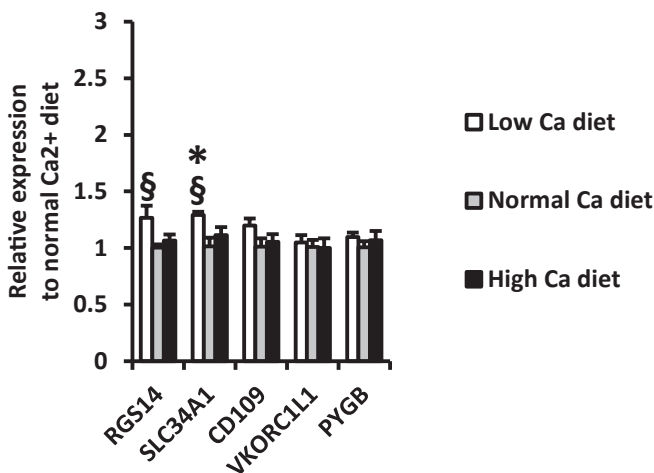

**Duodenum**

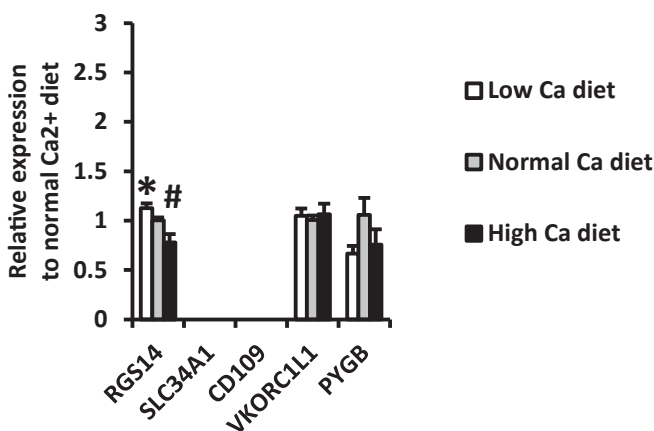

**Tibiae**

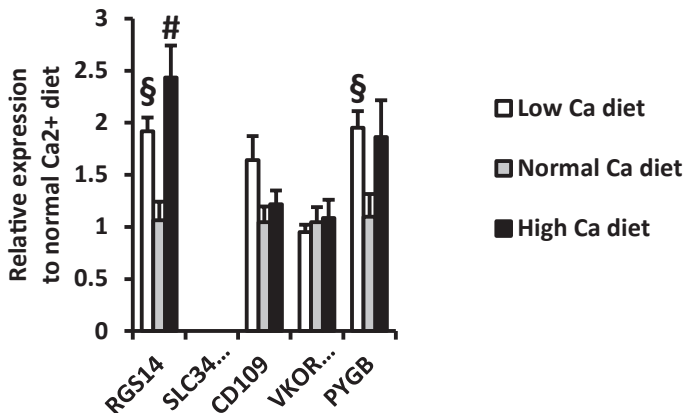

Supplement: pgen.1003796.s007.pdf [file pgen.1003796.s007.pdf]
