# Supplementary material for: Meta-Analysis of Genome-Wide Association Studies Identifies Six New Loci for Serum Calcium Concentrations
Source: PLOS journal article supplement (doi:10.1371/journal.pgen.1003796), 2013-09-19

SUPPLEMENTARY FIGURE 1: QQ-PLOT OF UNCORRECTED SERUM CALCIUM GWAS META-ANALYSIS

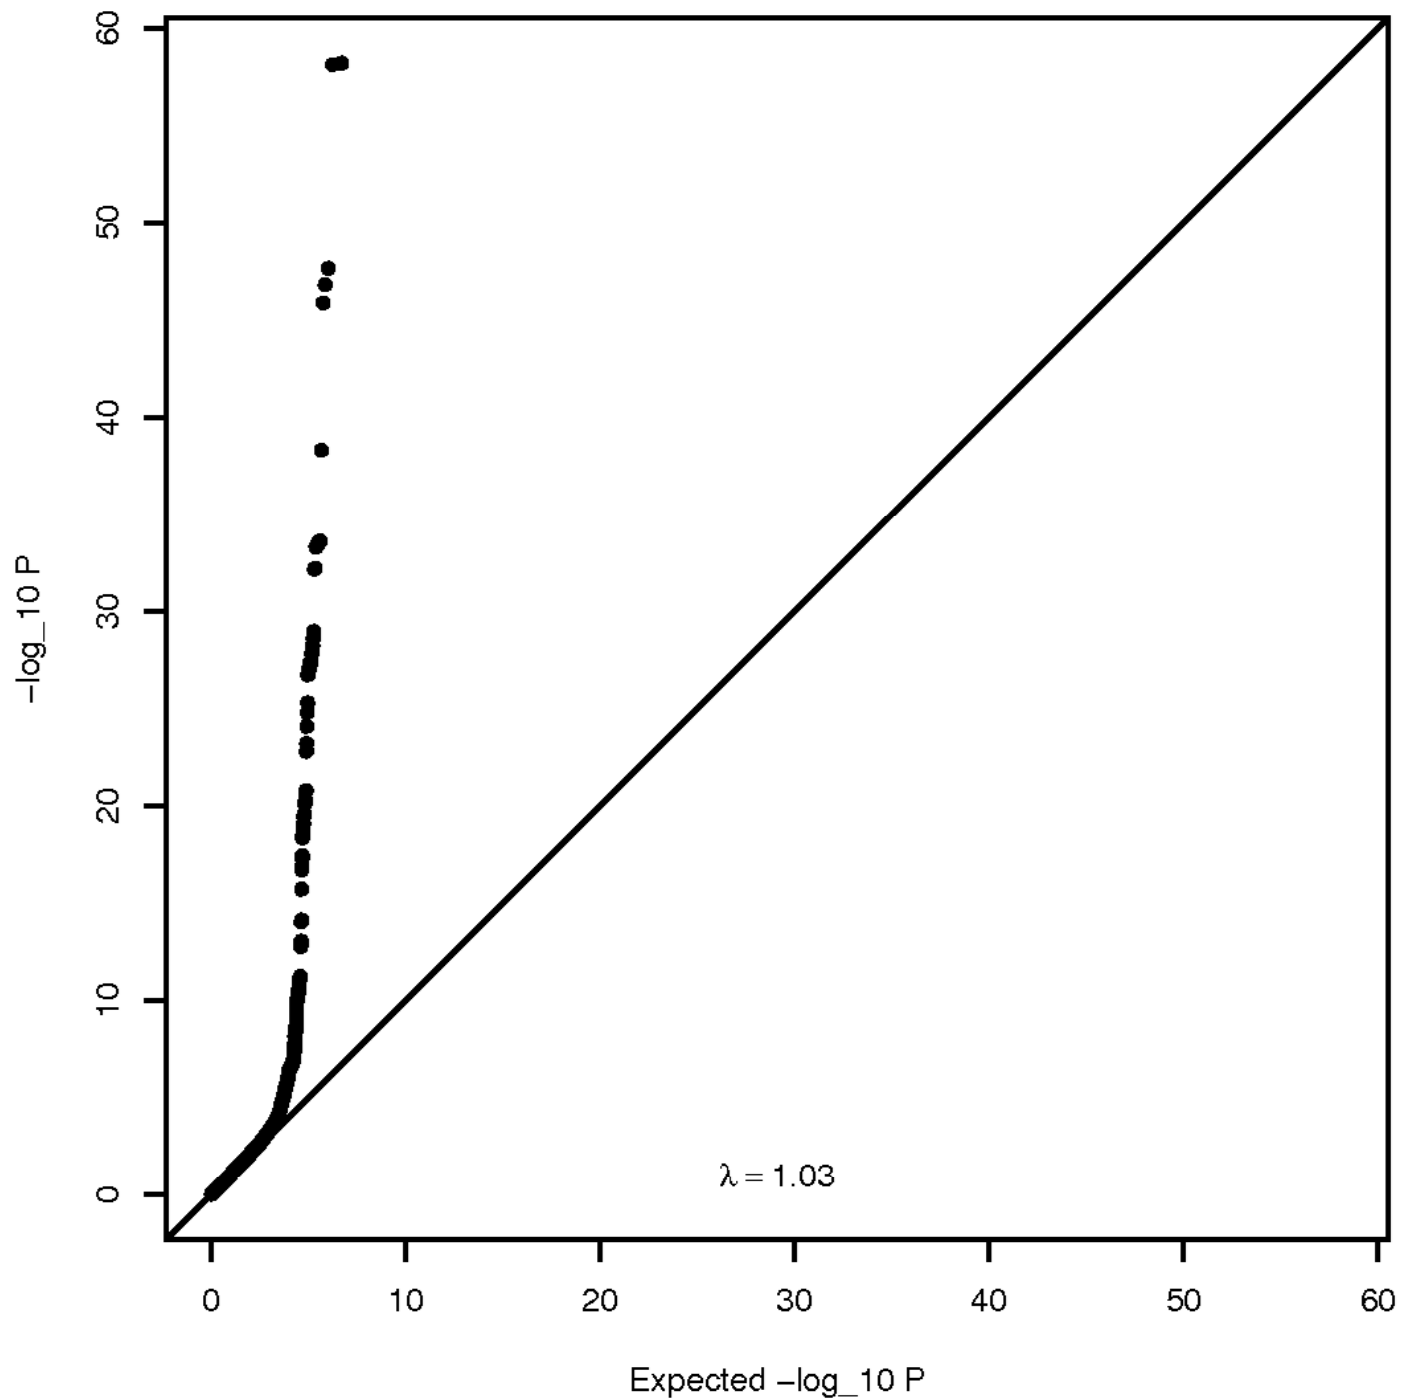

Supplement: S1 (10.1371/journal.pgen.1003796.s001) [file journal.pgen.1003796.s001]
