# Supplementary material for: Meta-Analysis of Genome-Wide Association Studies Identifies Six New Loci for Serum Calcium Concentrations
Source: PLOS journal article supplement (doi:10.1371/journal.pgen.1003796), 2013-09-19

SUPPLEMENTARY FIGURE 2: REGIONAL ASSOCIATION PLOT FOR THE CASR LOCUS

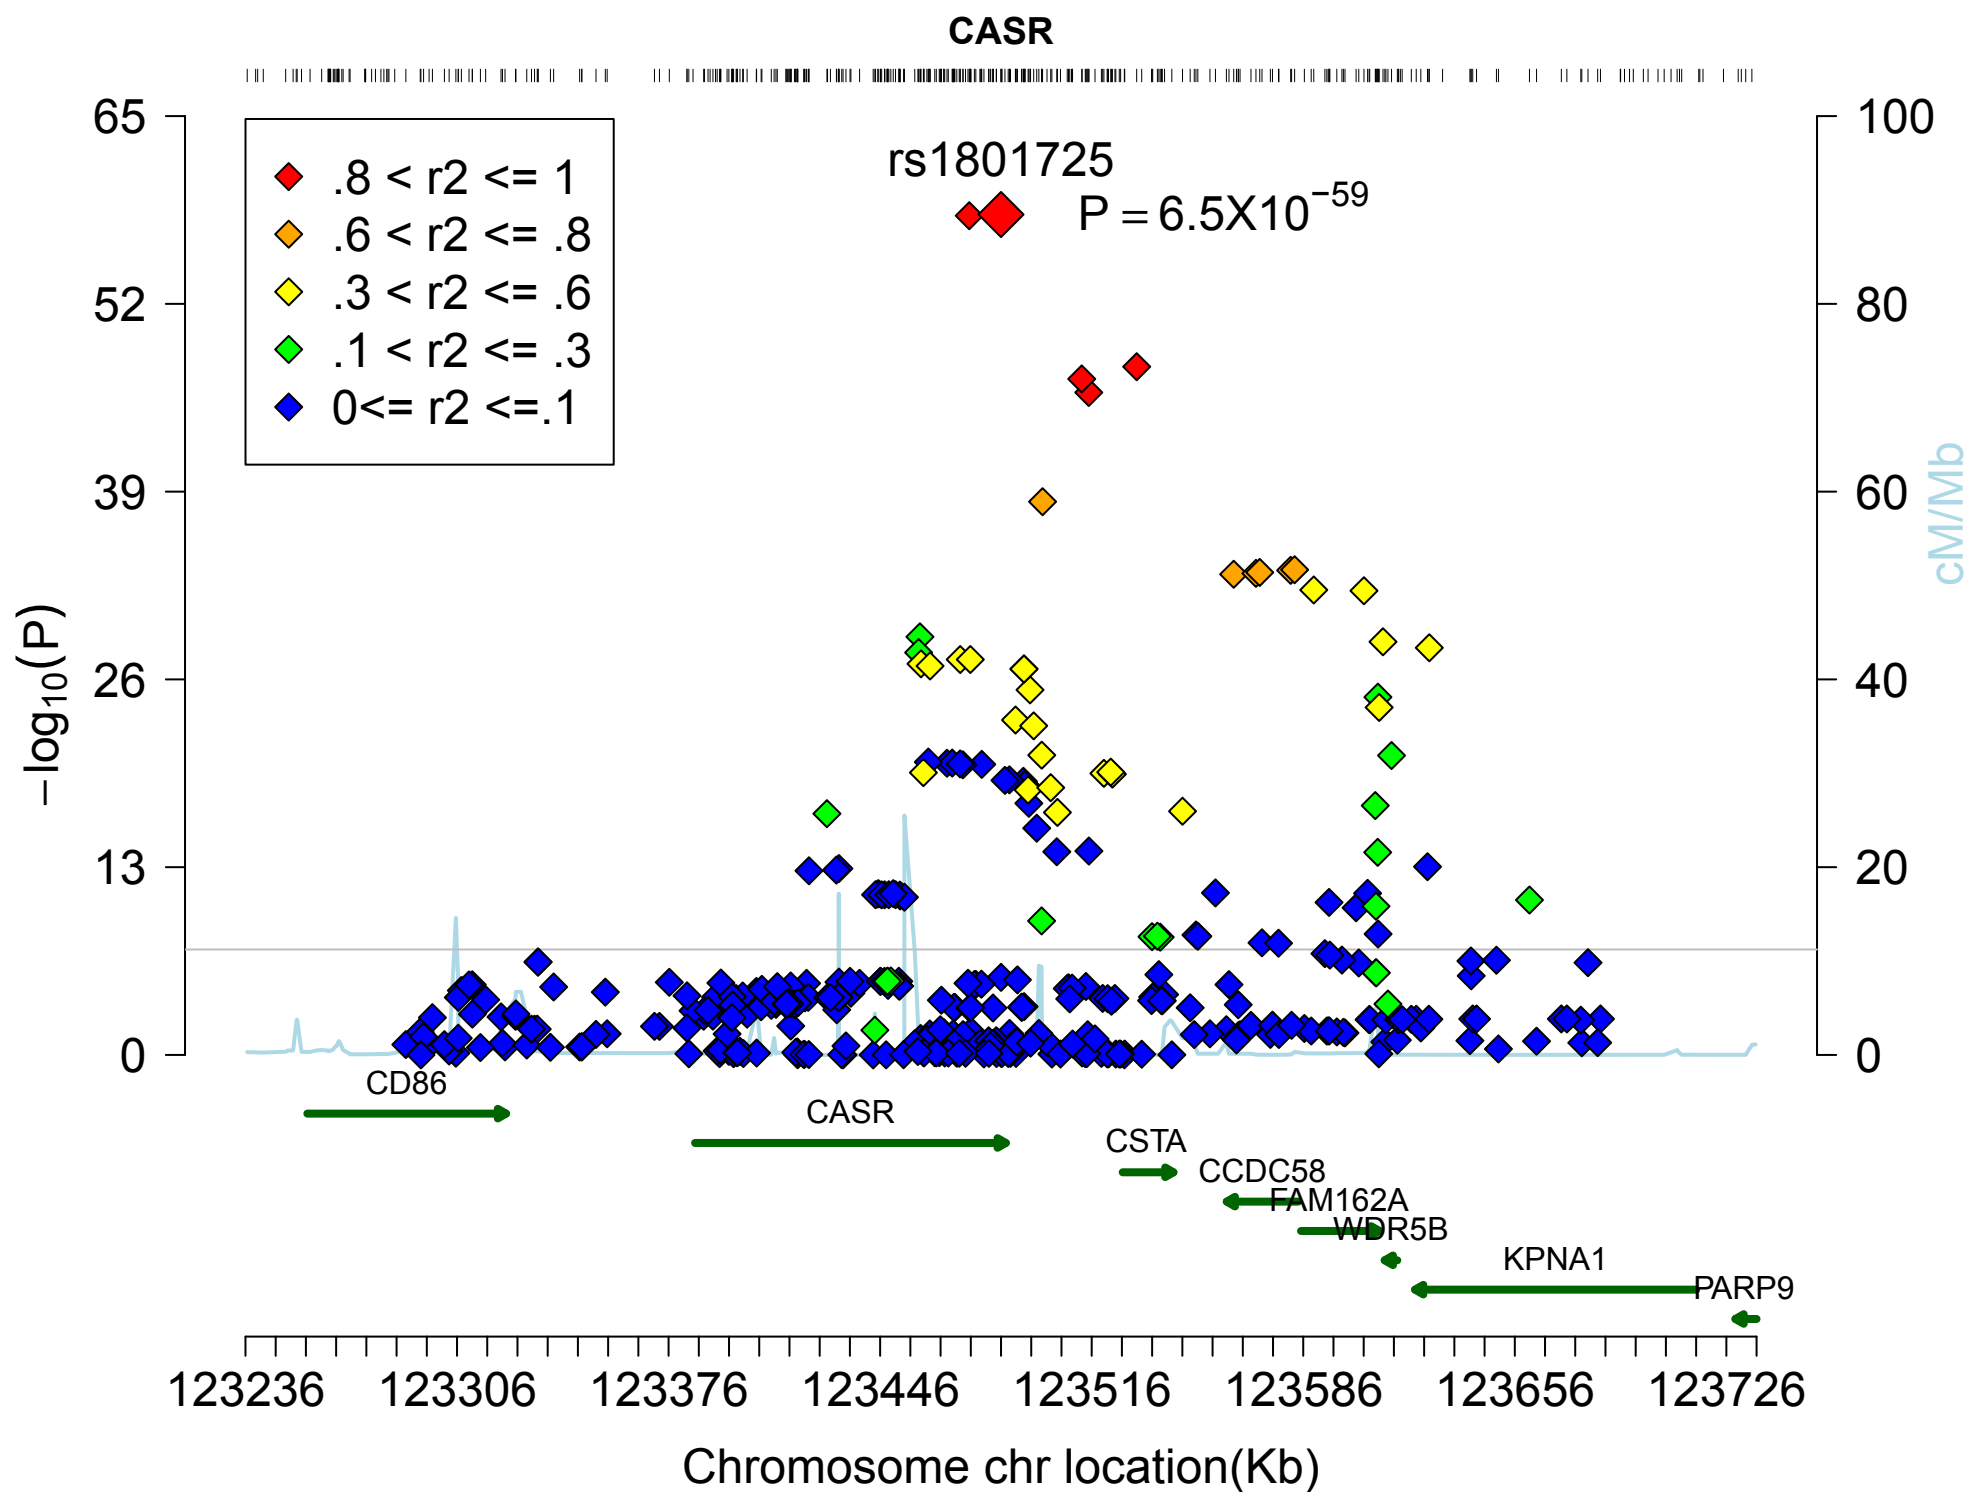

Supplement: S2 (10.1371/journal.pgen.1003796.s002) [file journal.pgen.1003796.s002]
