# Supplementary material for: Meta-Analysis of Genome-Wide Association Studies Identifies Six New Loci for Serum Calcium Concentrations
Source: PLOS journal article supplement (doi:10.1371/journal.pgen.1003796), 2013-09-19

SUPPLEMENTARY FIGURE 4: MANHATTAN PLOT OF CORRECTED SERUM CALCIUM GWAS META-ANALYSIS

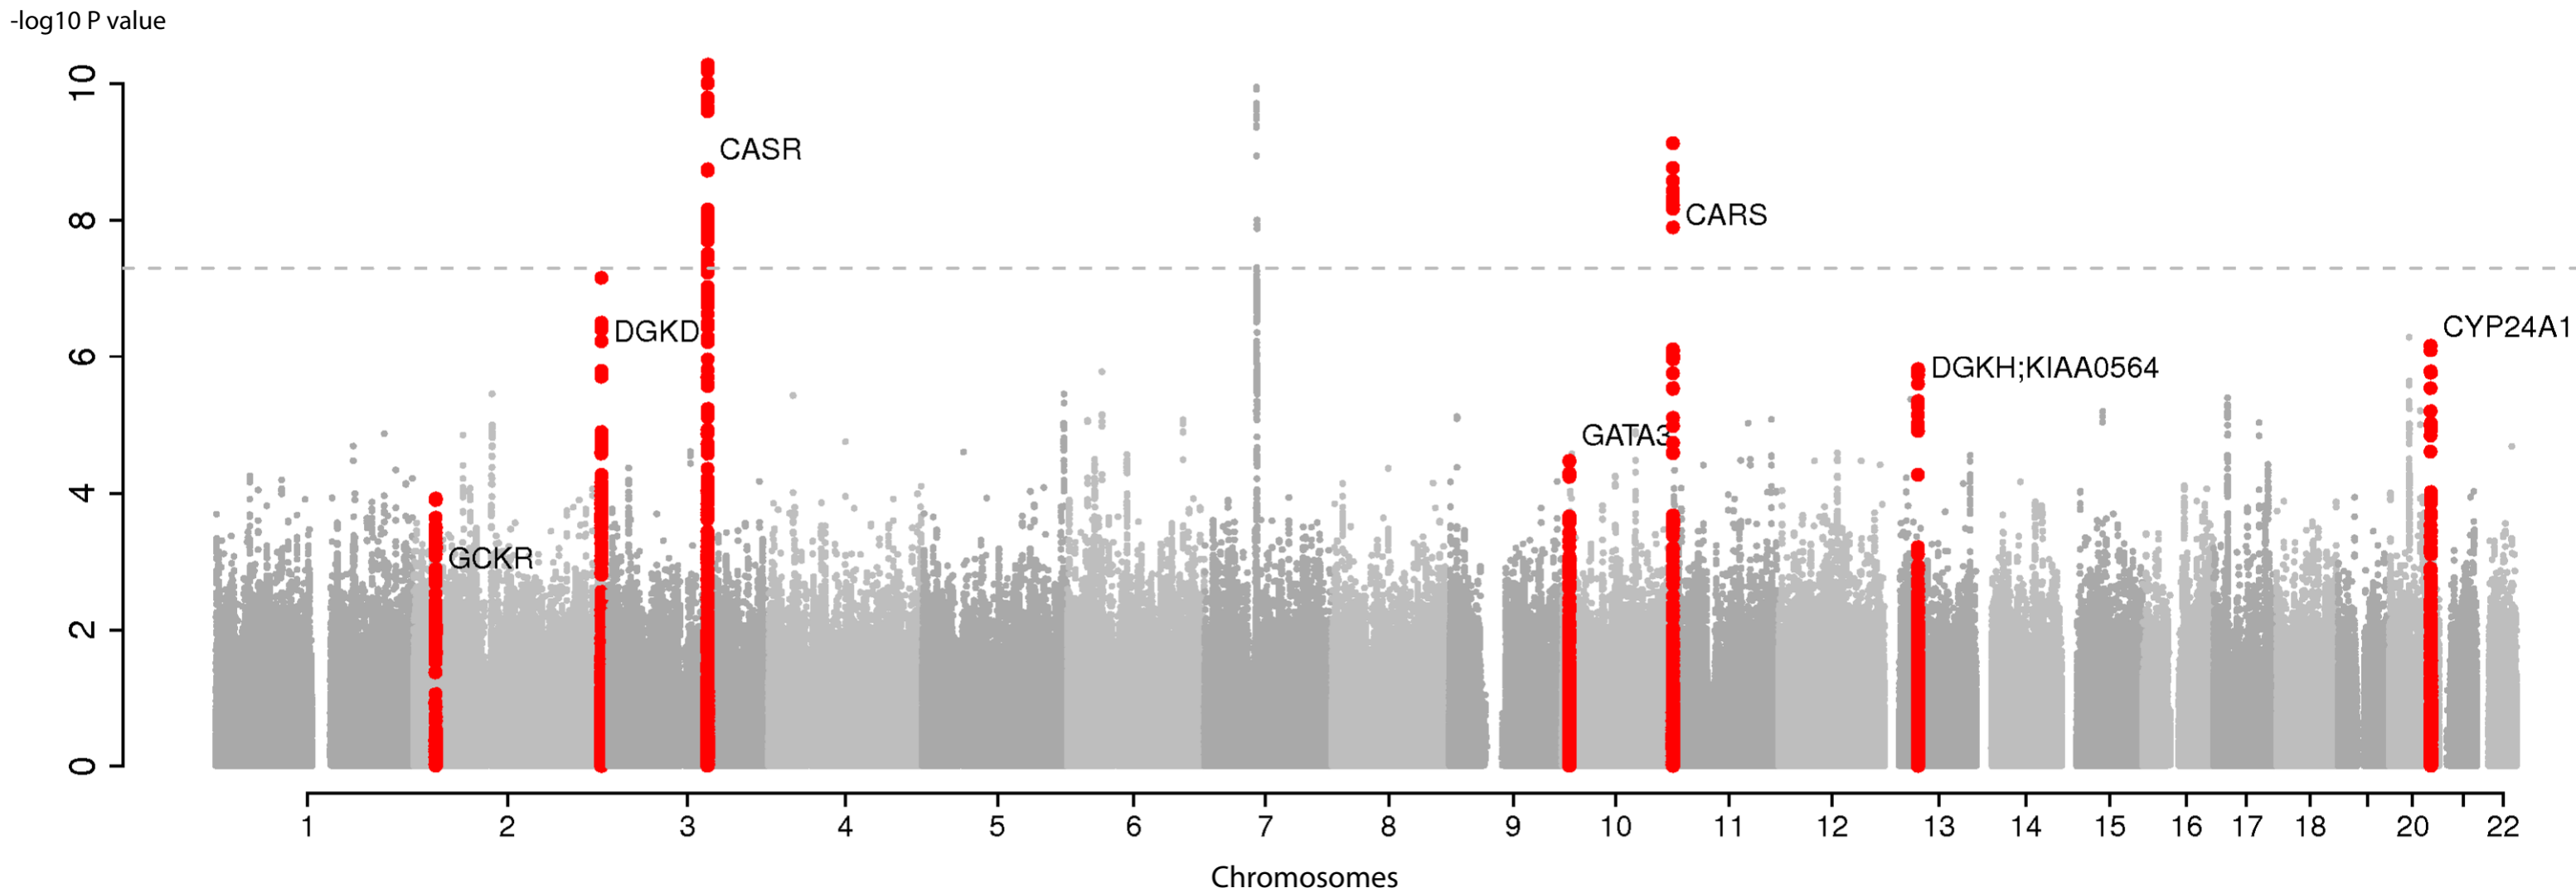

Supplement: S4 (10.1371/journal.pgen.1003796.s004) [file journal.pgen.1003796.s004]
