# Supplementary material for: Meta-Analysis of Genome-Wide Association Studies Identifies Six New Loci for Serum Calcium Concentrations
Source: PLOS journal article supplement (doi:10.1371/journal.pgen.1003796), 2013-09-19

SUPPLEMENTARY FIGURE 6: RELATIVE mRNA EXPRESSION OF GENES IN NON-REPLICATED LOCI IN KIDNEY, DUODENUM AND TIBIA.

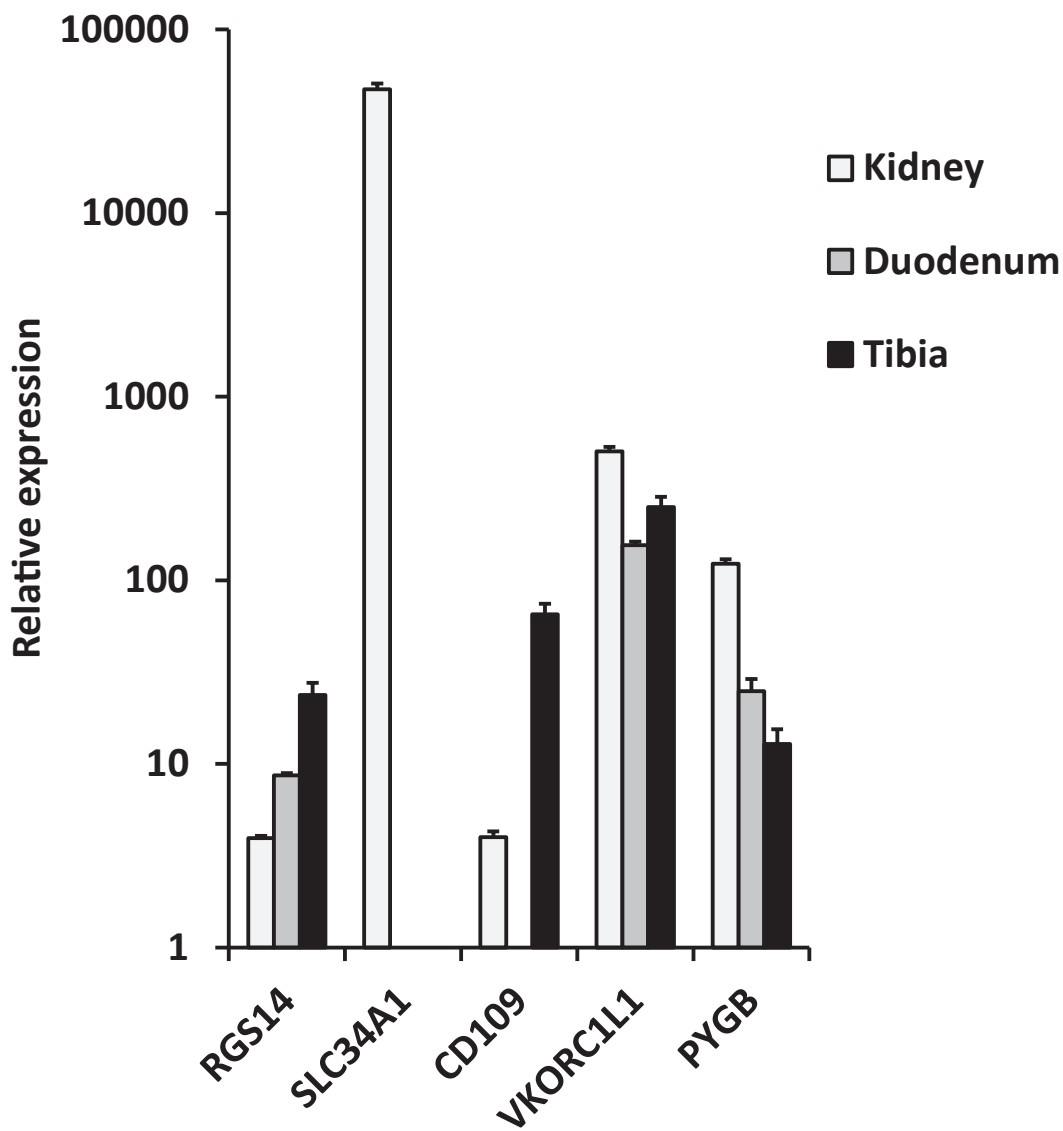

Supplement: S6 (10.1371/journal.pgen.1003796.s006) [file journal.pgen.1003796.s006]
