# Supplementary material for: Meta-Analysis of Genome-Wide Association Studies Identifies Six New Loci for Serum Calcium Concentrations
Source: PLOS journal article supplement (doi:10.1371/journal.pgen.1003796), 2013-09-19

SUPPLEMENTARY FIGURE 8: RELATIVE EXPRESSION OF GENES IN NON-REPLICATED LOCI UNDER VARIOUS CALCIUM DIETS.

§:  $p \leq 0.05$  (low compared to normal);  
#:  $p \leq 0.05$  (high compared to normal).

**Kidney**

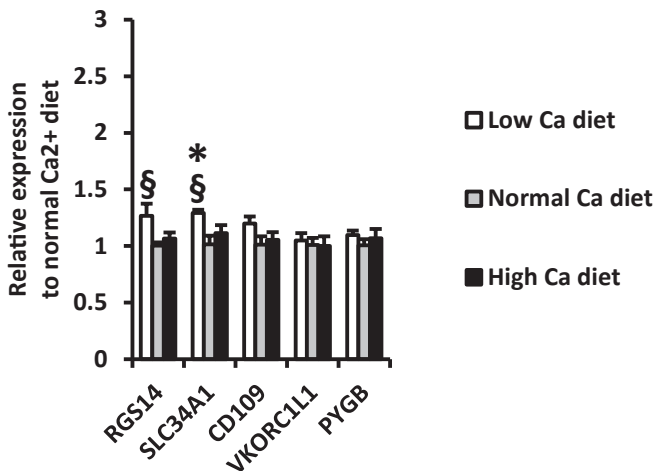

**Duodenum**

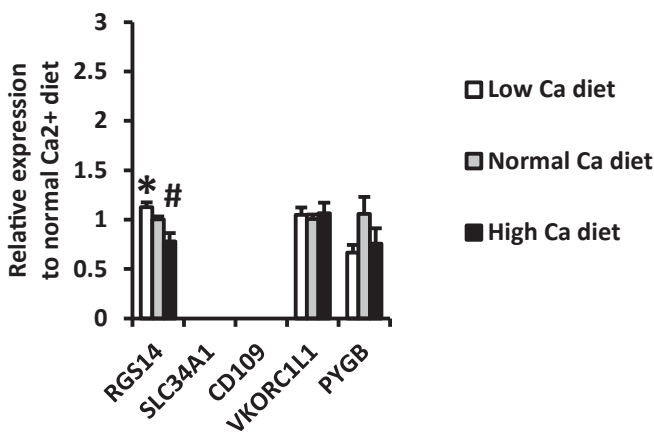

**Tibiae**

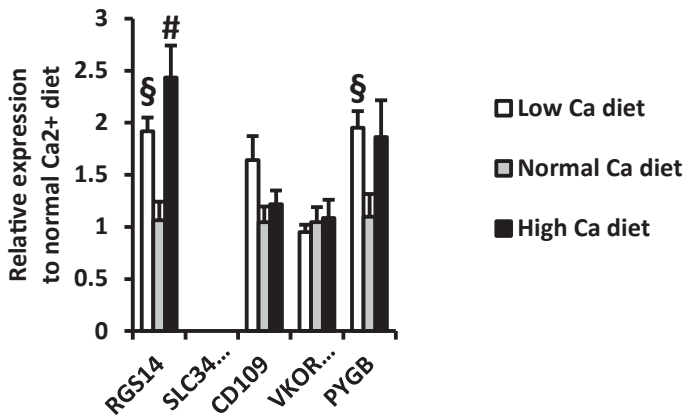

Supplement: S8 (10.1371/journal.pgen.1003796.s008) [file journal.pgen.1003796.s008]
